# Supplementary material for: Discovery of a novel imprinted gene by transcriptional analysis of parthenogenetic embryonic stem cells
Source: PubMed Central journal article supplement — Hum Reprod. 2010 Jun 3;25(8):1927–41. doi: 10.1093/humrep/deq144 (PMC2907230; doi:10.1093/humrep/deq144), 2010-06-03
Supplement: deq144_1.pdf [file deq144_1.pdf]

## Supplementary Data

### **Discovery of a novel imprinted gene by transcriptional analysis of parthenogenetic embryonic stem cells**

Hathaitip Sritanaudomchai, Hong Ma, Lisa Clepper, Sumita Gokhale, Randy Bogan, Jon Hennebold, Don Wolf & Shoukhrat Mitalipov

## Supplementary Figures

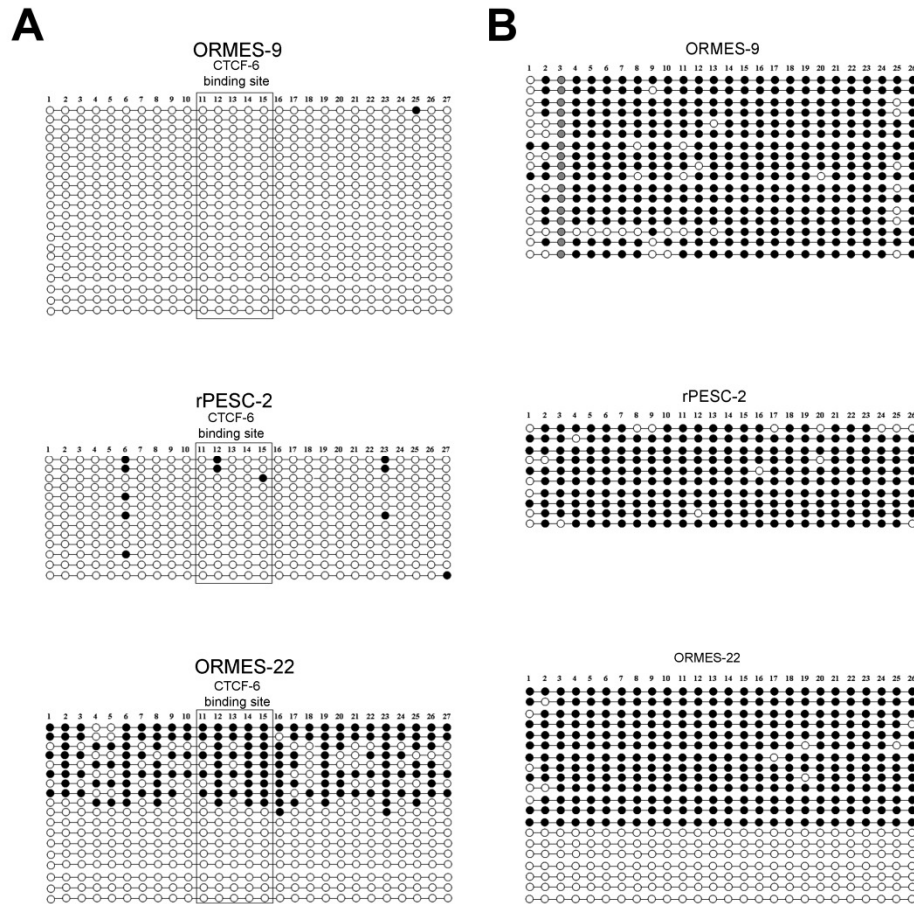

**Figure S1.** Analysis of known differentially methylated regions in rhesus monkey PESC. (A) Methylation status of the *IGF2/H19* and (B) *SNURF/SNURPN* imprinting centers in monkey parthenogenetic (ORMES-9 and rPEC-2) and IVF-derived biparental ESCs. Genomic DNA was modified by bisulfite treatment followed by polymerase chain reaction (PCR) amplification. PCR products were cloned and a minimum of 10 randomly selected clones were sequenced for each sample. Each circle represents an individual CpG site; methylated CpG dinucleotides are depicted by black circles and the unmethylated sites by open circles. Gray circles represent ambiguous CpG sites. Boxed area corresponds to the CTCF-6 core binding site.

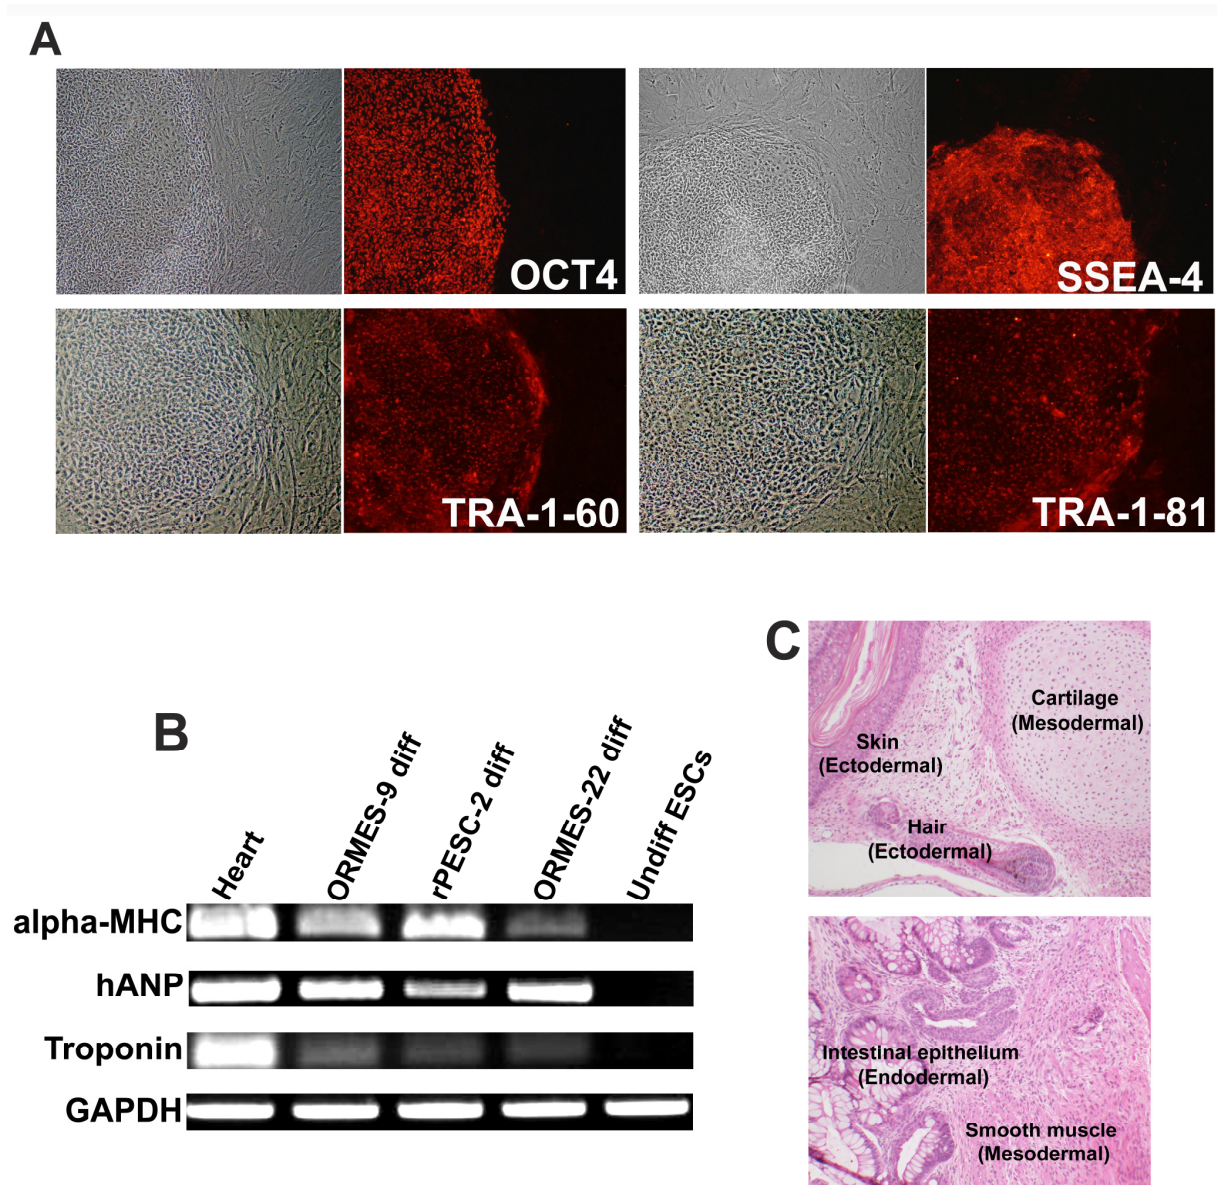

**Figure S2.** Pluripotency analysis of ORMES-9, a homozygous PESC line. (A) Left columns represent phase contrast images of ORMES-9 colonies and right columns demonstrate expression of primate ESC-specific markers, OCT4, SSEA-4, TRA-1-60, and TRA-1-81, detected by immunofluorescence. (B) Expression of cardiomyocyte and muscle tissue specific markers in differentiated spontaneously contracting PESCs (ORMES-9, rPESC-2) and biparental ORMES-22 determined by RT-PCR. (C) Pluripotency analysis by teratoma assay demonstrates representative tissue originated from the three germ layers.

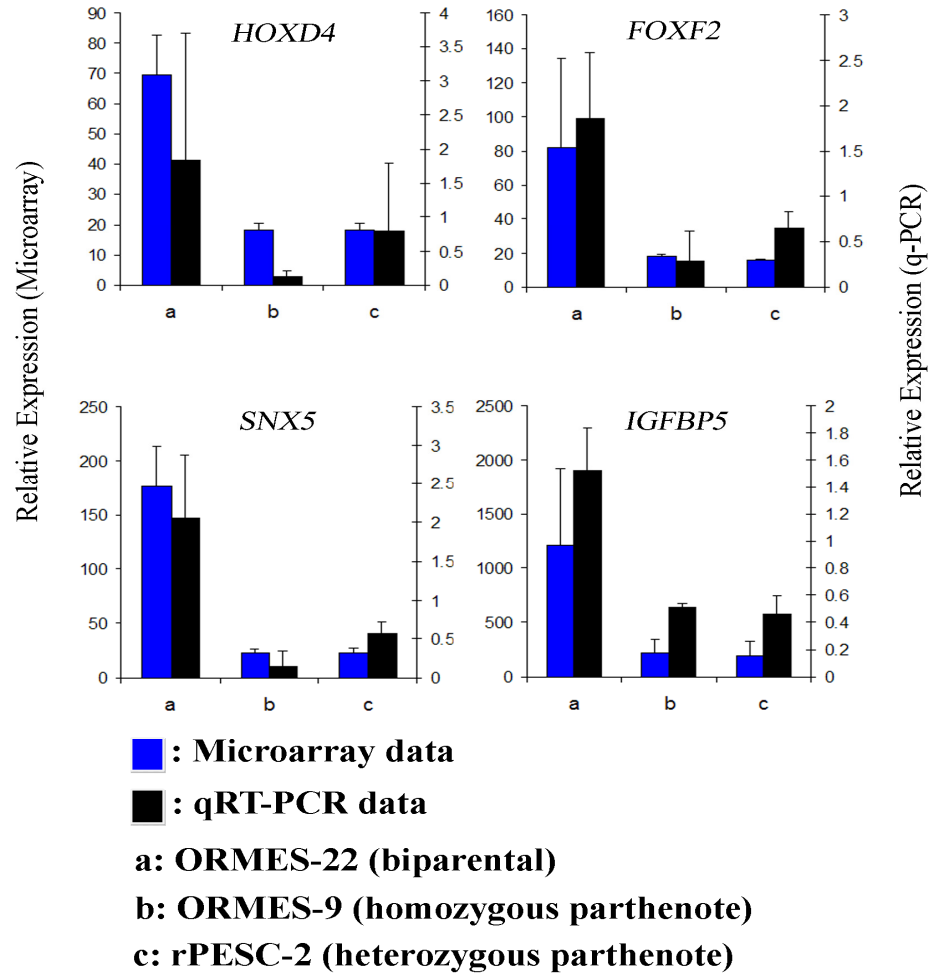

**Figure S3.** Validation of microarray data by qPCR. The X-axis represents analyzed cell lines (a: ORMES-22, b: ORMES-9 and c: rPESC-2). Microarray results are in blue columns and qPCR results are in black columns. The Y-axis represents RMA-normalized microarray expression values (left axis) or the target gene to *GAPDH* ratio for qPCR data (right axis). Data were analyzed by ANOVA followed by comparison between groups using the Student-Newman-Keuls test. The qPCR expression levels of *SNX5*, *FOXF2*, and *IGFBP5* in both parthenotes were significantly downregulated compared to biparental IVF-derived controls ( $P < 0.05$ ).

## Supplementary Tables

Table SI. Parentage analysis of monkey PESC by microsatellite typing

| Locus           | Sperm donor for ORMES-22 | Egg donor for ORMES-22 | ORMES-22 | Egg donor for rPESC-2 | rPESC-2 | Sperm donor for ORMES-9 | Egg donor for ORMES-9 | ORMES-9 |
|-----------------|--------------------------|------------------------|----------|-----------------------|---------|-------------------------|-----------------------|---------|
| <i>D1S548</i>   | 190/190                  | 190/190                | 190/190  | 190/206               | 190/206 | 190/206                 | 194/202               | 194/194 |
| <i>D2S1333</i>  | 285/289                  | 273/293                | 273/285  | 277/297               | 277/297 | 289/297                 | 265/305               | 305/305 |
| <i>D3S1768</i>  | 205/205                  | 205/213                | 205/205  | 205/221               | 205/221 | 205/217                 | 205/217               | 217/217 |
| <i>D4S2365</i>  | 283/283                  | 283/283                | 283/283  | 283/287               | 283/287 | 283/283                 | 283/287               | 287/287 |
| <i>D4S413</i>   | 125/141                  | 131/145                | 131/141  | 131/131               | 131/131 | 129/145                 | 129/137               | 129/129 |
| <i>D5S1457</i>  | 132/140                  | 132/136                | 136/140  | 132/132               | 132/132 | 132/132                 | 132/136               | 132/132 |
| <i>D6S276</i>   | 215/225                  | 225/233                | 225/233  | 215/225               | 225/225 | 225/233                 | 213/221               | 213/213 |
| <i>D6S291</i>   | 210/216                  | 206/216                | 210/216  | 206/208               | 206/206 | 214/216                 | 208/210               | 208/208 |
| <i>D6S501</i>   | 180/180                  | 188/192                | 180/188  | 180/184               | 180/184 | 180/192                 | 180/184               | 184/184 |
| <i>D6S1691</i>  | 197/203                  | 197/216                | 197/203  | 197/197               | 197/197 | 205/223                 | 209/215               | 209/209 |
| <i>D7S513</i>   | 193/199                  | 189/217                | 199/217  | 209/239               | 209/239 | 189/209                 | 201/213               | 201/201 |
| <i>D7S794</i>   | 108/128                  | 108/108                | 108/128  | 124/132               | 124/132 | 108/128                 | 124/124               | 124/124 |
| <i>D8S1106</i>  | 160/168                  | 148/168                | 168/168  | 148/160               | 148/160 | 144/160                 | 160/200               | 200/200 |
| <i>D9S921</i>   | 175/195                  | 183/195                | 183/195  | 187/195               | 187/195 | 175/179                 | 191/195               | 195/195 |
| <i>D10S1412</i> | 160/160                  | 157/157                | 157/160  | 157/157               | 157/157 | 157/157                 | 157/157               | 157/157 |
| <i>D11S2002</i> | 256/260                  | 252/252                | 252/256  | 252/252               | 252/252 | 264/264                 | 252/260               | 252/252 |
| <i>D11S925</i>  | 338/338                  | 308/308                | 308/338  | 308/330               | 308/330 | 312/338                 | 306/308               | 308/308 |
| <i>D12S364</i>  | 268/296                  | 282/290                | 268/290  | 290/290               | 290/290 | 282/288                 | 278/288               | 288/288 |
| <i>D12S67</i>   | 109/117                  | 117/133                | 109/133  | 117/212               | 117/212 | 125/212                 | 204/216               | 204/204 |
| <i>D13S765</i>  | 228/228                  | 216/236                | 228/236  | 224/232               | 232/232 | 228/228                 | 200/200               | 200/200 |
| <i>D15S823</i>  | 345/353                  | 357/385                | 345/385  | 333/357               | 333/333 | 329/349                 | 337/345               | 337/337 |
| <i>D16S403</i>  | 152/152                  | 152/164                | 152/164  | 162/164               | 162/164 | 158/164                 | 160/164               | 164/164 |
| <i>D17S1300</i> | 228/284                  | 248/252                | 252/284  | 248/260               | 248/260 | 228/248                 | 236/280               | 280/280 |
| <i>D18S537</i>  | 162/174                  | 174/178                | 162/178  | 162/174               | 162/174 | 178/178                 | 170/178               | 170/170 |
| <i>D18S72</i>   | 306/308                  | 308/308                | 308/308  | 308/322               | 308/322 | 308/318                 | 312/312               | 312/312 |
| <i>D22S685</i>  | 327/327                  | 311/311                | 311/327  | 319/319               | 319/319 | 315/319                 | 295/299               | 295/295 |
| <i>DXS2506</i>  | 270/270                  | 262/262                | 262/270  | 262/262               | 262/262 | 262/262                 | 270/274               | 274/274 |
| <i>MFGT21</i>   | 115/125                  | 111/113                | 113/125  | 111/115               | 111/115 | 115/119                 | 107/129               | 129/129 |
| <i>MFGT22</i>   | 104/110                  | 100/104                | 104/104  | 110/120               | 110/120 | 104/104                 | 110/122               | 110/110 |
| <i>D6S291</i>   | 210/216                  | 206/216                | 210/216  | 206/208               | 206/206 | 214/216                 | 208/210               | 208/208 |
| <i>G25641</i>   | 273/285                  | 269/281                | ND       | 269/273               | 273/273 | 279/281                 | 251/277               | 277/277 |
| <i>G51152</i>   | 219/219                  | 210/219                | 210/210  | 209/219               | 209/209 | 209/215                 | 219/219               | 219/219 |
| <i>9P06</i>     | 189/189                  | 175/187                | 175/189  | 185/191               | 185/185 | 189/191                 | 175/185               | 185/185 |
| <i>DRA</i>      | 112/134                  | 110/134                | 112/134  | 112/136               | 136/136 | 126/136                 | 112/140               | 112/112 |
| <i>MICACA</i>   | 194/194                  | 200/200                | 194/200  | 194/200               | 194/194 | 200/200                 | 200/200               | 200/200 |
| <i>246K06</i>   | 277/285                  | 283/283                | 283/285  | 275/279               | 275/275 | 275/275                 | 277/279               | 279/279 |
| <i>162B17A</i>  | 240/244                  | 238/242                | 238/244  | 238/242               | 238/238 | 238/250                 | 242/242               | 242/242 |
| <i>162B17B</i>  | 293/315                  | 289/309                | 293/309  | 309/309               | 309/309 | 309/311                 | 295/303               | 295/295 |
| <i>151L13</i>   | 303/309                  | 309/309                | 309/309  | 303/309               | 303/303 | 305/307                 | 303/311               | 311/311 |
| <i>MOGCA</i>    | 121/123                  | 123/127                | 123/127  | 121/123               | 121/121 | 123/127                 | 121/121               | 121/121 |
| <i>268P23</i>   | 148/150                  | 150/154                | 150/154  | 148/150               | 148/148 | 150/154                 | 148/148               | 148/148 |
| <i>222I18</i>   | 167/175                  | 167/173                | 173/175  | 167/167               | 167/167 | 167/173                 | 165/167               | 167/167 |
| <i>D6S276</i>   | 215/225                  | 225/233                | 225/233  | 215/225               | 225/225 | 225/233                 | 213/221               | 213/213 |
| <i>D6S1691</i>  | 197/203                  | 197/216                | 197/203  | 197/197               | 197/197 | 205/223                 | 209/215               | 209/209 |

Heterozygous loci are shown in red. ND is not determined. ORMES-9 and ORMES-22 represent Oregon Rhesus Macaque Embryonic Stem-9 and -22, respectively and rPESC-2 represent rhesus Parthenogenetic Embryonic Stem Cell.

**Table SII.** Parentage analysis of monkey PESC's by single nucleotide polymorphism (SNP) assay

| SNPs        | Sperm donor for ORMES-22 | Egg donor for ORMES-22 | ORMES-22 | Egg donor for rPESC-2 | rPESC-2 | Sperm donor for ORMES-9 | Egg donor for ORMES-9 | ORMES-9 |
|-------------|--------------------------|------------------------|----------|-----------------------|---------|-------------------------|-----------------------|---------|
| BCHE:76     | CG                       | C                      | CG       | C                     | C       | ND                      | C                     | C       |
| BCHE:447    | AG                       | G                      | AG       | AG                    | G       | A                       | A                     | A       |
| CCL8:516    | A                        | AG                     | A        | G                     | G       | AG                      | G                     | G       |
| CCR1:641    | AG                       | G                      | ND       | G                     | G       | G                       | G                     | G       |
| CCR9:315    | C                        | C                      | C        | C                     | C       | CT                      | T                     | T       |
| CD40LG:738  | G                        | A                      | AG       | G                     | G       | G                       | A                     | A       |
| CD44:471    | T                        | T                      | T        | T                     | T       | T                       | CT                    | C       |
| CD69:294    | C                        | CT                     | CT       | CT                    | CT      | C                       | CT                    | C       |
| CD74:213    | C                        | C                      | ND       | C                     | C       | C                       | C                     | C       |
| CD74:344    | CT                       | T                      | T        | CT                    | CT      | CT                      | C                     | C       |
| CFTR:796    | G                        | G                      | G        | AG                    | G       | G                       | AG                    | G       |
| CX3CR1:593  | AG                       | A                      | A        | AG                    | AG      | G                       | G                     | G       |
| CXCL12:173  | ND                       | CT                     | ND       | C                     | C       | CT                      | C                     | C       |
| FAS:135     | A                        | AG                     | A        | A                     | A       | A                       | A                     | A       |
| FSHR:784    | CG                       | C                      | C        | CG                    | CG      | C                       | C                     | C       |
| HTATSF1:636 | C                        | C                      | ND       | C                     | C       | C                       | C                     | C       |
| IL1:755     | T                        | A                      | A        | AT                    | AT      | AT                      | AT                    | T       |
| IL2RA:124   | C                        | C                      | C        | C                     | C       | C                       | C                     | C       |
| INHBB:131   | CT                       | C                      | CT       | C                     | C       | CT                      | C                     | C       |
| ITGA:321    | A                        | A                      | A        | A                     | A       | A                       | AG                    | A       |
| LRP8:647    | CT                       | C                      | CT       | T                     | T       | T                       | T                     | T       |
| NDN:135     | G                        | G                      | G        | G                     | G       | ND                      | G                     | G       |
| NR3C1:458   | T                        | T                      | ND       | T                     | T       | T                       | AT                    | T       |
| PYY:151     | CT                       | T                      | CT       | T                     | T       | CT                      | T                     | T       |
| SIRT1:277   | G                        | T                      | ND       | GT                    | GT      | GT                      | G                     | G       |
| SLC5A7:79   | GT                       | T                      | GT       | G                     | G       | ND                      | G                     | G       |
| SLC6A4:132  | CG                       | G                      | G        | GC                    | C       | G                       | G                     | G       |
| STAR:522    | GT                       | GT                     | GT       | GT                    | G       | GT                      | T                     | T       |
| TLR4:735    | CT                       | T                      | ND       | T                     | T       | CT                      | T                     | T       |
| TLR5:389    | C                        | CT                     | ND       | TC                    | C       | CT                      | C                     | C       |
| TNF:82      | T                        | T                      | T        | T                     | T       | T                       | C                     | C       |
| XCL1:320    | T                        | CT                     | ND       | C                     | C       | T                       | T                     | T       |

Heterozygous loci are shown in red. ND is not determined. ORMES-9 and ORMES-22 represent Oregon Rhesus Macaque Embryonic Stem-9 and -22, respectively and rPESC-2 represent rhesus Parthenogenetic Embryonic Stem Cell.

**Table SIII. Primers, probes and PCR conditions**

| Primers for RT-PCR          |                                                     |                             |                         |                   |
|-----------------------------|-----------------------------------------------------|-----------------------------|-------------------------|-------------------|
| Genes                       | Forward primer (5'-3')                              | Reverse primer (5'-3')      | Anneal Temp (°C)        | Product size (bp) |
| <i>Alpha-MHC</i>            | GTCATTGCTGAAACCGAGAATG                              | GCAAAGTACTGGATGACACGCT      | 61                      | 413               |
| <i>hANP</i>                 | GAACCAGAGGGGAGAGACAGAG                              | CCCTCAGCTTGCTTTTTAGGAG      | 61                      | 406               |
| <i>Troponin</i>             | GGCAGCGGAAGAGGATGCTGAA                              | GAGGCACCAAGTTGGGCATGAACGA   | 64                      | 150               |
| <i>GAPDH</i>                | GTGGTCTCCTCCGACTTCAACA                              | GTCTCTCTCTCTCTTTGTGCTCT     | 61                      | 217               |
| <i>COL3A1</i>               | TTGAATCCTAGCCCATCTGC                                | AAGCAGCCCCATTATTTGGT        | 58                      | 695               |
| <i>CA3</i>                  | TGTGGTCACCAAGAAACCAA                                | GGCCCTCCTTCAGGTAAGA         | 60                      | 695               |
| <i>FOXD1</i>                | GCTCGAGGAAGAAGGTAGGAA                               | AGGGGACAACGAAGCCAAT         | 60                      | 710               |
| <i>SNX5</i>                 | ATGTCTCCCTTTTGCAGAGC                                | ATGCCCAAAGACATACACCA        | 60                      | 757               |
| <i>LOC703703</i>            | ACTCCGGTTCCTGGTCTTTT                                | GCTCATAACGCTCCATCTCC        | 60                      | 505               |
| <i>IGFBP5</i>               | TTCACAGACTCTGGCCTCCT                                | CTTCCGCATTCAGATGGTTT        | 58                      | 503               |
| <i>HOXD4</i>                | TTCCAGAAGGAAGCAAAGGA                                | CCCCTGTTGAGAGTGATTCC        | 58                      | 597               |
| <i>INPP5F</i>               | AAATCCAGAAGTCCGGTTT                                 | TCAGCCGAGAATCAATCACA        | 60                      | 505               |
| <i>INPP5F</i>               | GAGGCTCTGTGCCTGTCTTT                                | TTCAGCTGCTGTTCATGAC         | 58                      | 466               |
| <i>INPP5F_v2</i>            | ATGTGTGCTGACGTAATTTTATG                             | GCTCGCAGTGTGTGGAAATA        | 55                      | 299               |
| <i>PTPRB</i>                | GGAGGCTCCCTTGAATAAAA                                | GTGCACCCTCTTGTC AAGGT       | 60                      | 526               |
| <i>CEP68</i>                | CTGGAAGGAGGAAAGCACAG                                | ATGCCACATTCTGCATTCAA        | 60                      | 598               |
| <i>ACTC1</i>                | CCTTCCAGCAGATGTGGATT                                | GTGGCATCTGCAGCAACTAA        | 60                      | 532               |
| <i>SERPINE1</i>             | CCATGCAAAGCAACGACTAC                                | CTGCACAACAGCAACCTTGT        | 60                      | 600               |
| Gene                        | Primers for qPCR (SYBR Green)                       |                             |                         |                   |
| Tel1                        | GGT TTT TGA GGG TGA GGG TGA GGG TGA GGG TGA GGG T   |                             |                         |                   |
| Tel2                        | TCC CGA CTA TCC CTA TCC CTA TCC CTA TCC CTA TCC CTA |                             |                         |                   |
| 36B4u                       | CAG CAA GTG GGA AGG TGT AAT CC                      |                             |                         |                   |
| 36B4d                       | CCC ATT CTA TCA TCA ACG GGT ACA A                   |                             |                         |                   |
| Primers and probes for qPCR |                                                     |                             |                         |                   |
| Genes                       | Forward primer (5'-3')                              | Reverse primer (5'-3')      | Probes                  |                   |
| <i>SGCE</i>                 | ACCCAAAACCTGGCGAGAT                                 | TCCAGGTCCGGTCTGGGTAAC       | AGTAATGATCCCATAACATT    |                   |
| <i>SNRPN</i>                | AAGCAACCAGAGCGTGAAGAA                               | TCCCCACGCAGCAACAC           | AGCGGGTTTTGGGTCT        |                   |
| <i>H19</i>                  | CCTCCCGACTCTGTTTCC                                  | CACAACCCAACCAGTGCAAA        | CCGTCCTTCTGAATT         |                   |
| <i>IGF2</i>                 | GTCGGCCAGCCAGAGT                                    | CGGCTACCATCATCTCCATTG       | AGGAAGGAGTTGGCC         |                   |
| <i>NECDIN</i>               | TGTCTCCGAGGACTAGCCAAGT                              | GCCCTGGTGGAGATCAGAAA        | TGGAGGCAGATGAAT         |                   |
| <i>UBE3A</i>                | GAAGGAGAACAAGGAGTTGATGAAG                           | CCTCCACAACCAGCTGAAAAA       | AGGTGTTCCAAAGAA         |                   |
| <i>PEG10</i>                | CCCTTCGAGAGCAAGTGGA                                 | GCGGAGCTCGATGTCATCAT        | CCACCCTGAGGATG          |                   |
| <i>ATP10A</i>               | GCCCGCCAACGTGTAC                                    | ACCGCCGCACGAAGT             | TTGTCTTCATCGCGCTGC      |                   |
| <i>CDKN1C</i>               | CATCTACGATGGAGCGTCTTGTC                             | GCTGGTGCACAAGTACTG          | CCGTGGACCTTC            |                   |
| <i>DLX5</i>                 | ACCAACCAGCCAGAAAAGAAG                               | TTGGTTTGCCATTCACCATT        | CACCTCGGGCTCGG          |                   |
| <i>GNAS</i>                 | TGGCCAGCAGCAGCTACA                                  | TCCTGCAGGCGGTTGGT           | TCATCCGGGAGGACAA        |                   |
| <i>MAGEL2</i>               | CAGGGCCCTTCGAAAGA                                   | CTGCCTTGGGAGCACAGAA         | CGCATGATCTTTGTCTG       |                   |
| <i>MEST</i>                 | CCTGCCCTCAGTCTAGGAA                                 | GGTAGAAGATACGCAGTCCCTGT     | TCTCAGGCAAGTTTTT        |                   |
| <i>PEG3</i>                 | CAAGCACCAGTCGAGGTCTAAA                              | CGCCGGTGGGTTGATT            | ACTATGCCTGAAGCCAA       |                   |
| <i>PHLDA2</i>               | GAGCGCACCGGCAAGTAC                                  | CAGCGGAAGTCGATCTCCTT        | TGTACTTCACCATCGTCA      |                   |
| <i>SLC22A18</i>             | CCCAGCCTGGTGTTCAG                                   | GGCCTTGGTCAGCATGCT          | TCTGCACACTCAATG         |                   |
| <i>ZIM2</i>                 | CCTACTCAGTCCGTTCTTTCA                               | GGCTCATGTCTCTGCTTCTG        | TGGTGACGGGACTG          |                   |
| <i>TP73</i>                 | CCAGCACGGCCAAGTCA                                   | CTTGGCGATCTGGCAGTAGAG       | CTGGACGTACTCCC          |                   |
| <i>GAPDH</i>                | GGTGGTCTCTCCGACTTCA                                 | ACCAGGAAATGAGCTTGACAAAG     | CCCCTCTTCCACCTTCGACGCTG |                   |
| <i>DIRAS3</i>               | CGGCAACTCCGTCATGAGT                                 | CCAGCAACTGGCAGTAGGATTT      | CCTGCCGACCATTG          |                   |
| <i>XIST</i>                 | CCATGCTGGGTGCTAGAGCTA                               | CCATTGACATTTGTATCATGCTTTAGT | AGGTGCATATTAAGTGC       |                   |

## **MIAME Checklist**

### **Experimental Design**

#### **Authors:**

**Hathaitip Sritanaudomchai<sup>1</sup>, Hong Ma<sup>1</sup>, Lisa Clepper<sup>1</sup>, Sumita Gokhale<sup>2</sup>, Randy Bogan<sup>1</sup>, Jon Hennebold<sup>1,3</sup>, Don Wolf<sup>1</sup>, Shoukhrat Mitalipov<sup>1,3,4,5,\*</sup>**

<sup>1</sup>Oregon National Primate Research Center, <sup>3</sup>Departments of Obstetrics & Gynecology and <sup>4</sup>Molecular & Medical Genetics and <sup>5</sup>Oregon Stem Cell Center, Oregon Health □ Science University, Beaverton, Oregon, 97006, USA.

<sup>2</sup>Department of Pathology, Roger Williams Medical Center, Providence, Rhode Island, 02908, USA.

**\*Correspondence:** E-mail: [mitalipo@ohsu.edu](mailto:mitalipo@ohsu.edu)

#### **Type of experiment:**

The transcriptomes of rhesus monkey embryonic stem cell lines derived from IVF-produced embryos (Oregon Rhesus Macaque Embryonic Stem, ORMES-22) were compared with rhesus monkey parthenogenetic embryonic stem cell lines (heterozygous rPESC-2 and homozygous ORMES-9). In addition, the transcriptome of rPESC-2 line was also compared with ORMES-9. Finally, the adult somatic skin fibroblasts were compared to each parthenote cell line as well as the biparental control ESCs.

#### **Experimental factors:**



Three biological replicates (A, B, C) of: ORMES-9, ORMES-22, rPESC-2 and adult skin fibroblasts were analyzed.

**Number of hybridizations:**

12 hybridizations on oligonucleotide arrays (Affymetrix Rhesus Macaque Genome Array).

**Hybridization design:**

ESC replicates were compared against each somatic replicate and select comparisons between ESC replicates were performed.

**Type of reference used for the hybridizations:**

No reference used.

**Quality control steps:**

Standard Affymetrix control steps. Approximately 200 ng of each sample cRNA target along with a control cRNA target is analyzed on the RNA 6000 LabChip using the 2100 Bioanalyzer (Agilent Technologies). The target quality is determined based on cRNA yield and size distribution produced from the in vitro synthesis reaction. Samples that fail quality control are discarded or relabeled.

**Number of replicates:**

Three biological replicates per cell line.

**URL of supplemental web sites / database accession numbers:**

The data have been deposited in NCBI's Gene Expression Omnibus (GEO, <http://www.ncbi.nlm.nih.gov/geo/query/acc.cgi?token=tjsddkusgemowbk&acc=GSE17964>) and are accessible through GEO Series accession number.

## Samples

### Origin of sample:

Organism: *Macaca mulatta*

All stem and somatic cell lines were generated by us at the Oregon National Primate Research Center. Somatic fibroblasts were derived from a skin biopsy from a nine year old adult male rhesus monkey.

### Sample used in microarray experiment

| Sample         | Microarray Name | GEO ID    | Contents                                |
|----------------|-----------------|-----------|-----------------------------------------|
| A_FibroblastsA | FIB_A           | GSM449698 | Skin fibroblasts (Male #1) replicate A  |
| B_FibroblastsB | FIB_B           | GSM449699 | Skin fibroblasts (Male #1) replicate B  |
| C_FibroblastsC | FIB_C           | GSM449700 | Skin fibroblasts (Male #1) replicate C  |
| D_ORMES22A     | ORMES22_A       | GSM449701 | ORMES-22 (IVF derived ESCs) replicate A |
| E_ORMES22B     | ORMES22_B       | GSM449702 | ORMES-22 (IVF derived ESCs) replicate B |
| F_ORMES22C     | ORMES22_C       | GSM449703 | ORMES-22 (IVF derived ESCs) replicate C |
| G_rPESC2A      | rPESC2_A        | GSM449704 | rPESC-2 (heterozygous PESC) replicate A |
| H_rPESC2B      | rPESC2_B        | GSM449705 | rPESC-2 (heterozygous PESC) replicate B |
| I_rPESC2C      | rPESC2_C        | GSM449706 | rPESC-2 (heterozygous PESC) replicate C |
| J_ORMES9A      | ORMES9_A        | GSM449707 | ORMES-9 (homozygous PESC) replicate A   |
| K_ORMES9B      | ORMES9_B        | GSM449708 | ORMES-9 (homozygous PESC) replicate B   |
| L_ORMES9C      | ORMES9_C        | GSM449709 | ORMES-9 (homozygous PESC) replicate C   |

### Manipulation of samples:

PESCs were grown at 37°C in 5% CO<sub>2</sub> atmosphere on mitotically inactivated mEF feeder cells in Dulbecco's Modified Eagle's Medium/F12 (DMEM/F12) (Invitrogen) supplemented with 15% fetal bovine serum (FBS) (Hyclone), 0.1mM β-mercaptoethanol (Sigma), 1% nonessential amino acids (Invitrogen), 2mM L-glutamine (Invitrogen) and a pH of 7.2 (altered with 4N NaOH). PESC colonies were manually passaged every 4-5 days. ESCs with an undifferentiated morphology were manually removed from culture for total RNA purification.

#### **Protocol for preparing hybridization extract:**

Total RNA was extracted using Trizol<sup>®</sup> reagent (Invitrogen) followed by additional purification on RNeasy spin columns (Qiagen) following manufacturer recommendations.

#### **Labeling protocol:**

Microarray assays were performed in the Affymetrix Microarray Core of the OHSU Gene Microarray Shared Resource. Messenger RNA is amplified and labeled from 2μg of total RNA in two steps according to the standard Affymetrix one-cycle cDNA protocol (Expression Analysis Technical Manual Rev.4). In the first step, mRNA is converted to double-stranded cDNA using Superscript Reverse Transcriptase (Invitrogen) and an oligo-dT primer linked to a T7 RNA polymerase binding site sequence (Affymetrix). In the second step, amplified and labeled cRNA (the target) is produced in an in vitro transcription reaction using T7 RNA polymerase and biotin-UTP (Affymetrix). Following removal of free nucleotides, target yield is measured by UV<sub>260</sub> absorbance.

#### **External controls (spikes):**

Biotinylated hybridization control oligomer and biotinylated control cRNAs for BioB, BioC, BioD and CreX (Affymetrix) at 1.5, 5, 25, and 100 pM concentrations, respectively, in hybridization buffer.

### **Hybridization Procedures and Parameters**

#### **Protocol and conditions:**

Labeled target is fragmented at 95° C in the presence of high magnesium concentration. The fragmented material is combined with biotinylated hybridization control oligomer and biotinylated control cRNAs for BioB, BioC, BioD and CreX (Affymetrix) in hybridization buffer. Ten µg of target is hybridized for 16 hours at 45°C to the GeneChip Rhesus Macaque Genome array (Affymetrix), followed by washing, staining with streptavidin-phycoerythrin (Molecular Probes), signal amplification with biotinylated anti-streptavidin antibody (Vector Labs), and a final staining step on the Fluidics Station 450 (Affymetrix). The distribution of fluorescent material on the processed array is determined using the GeneChip Scanner 3000 with the 7G upgrade (Affymetrix) and GCOS version 1.4.0 software (Affymetrix), yielding cell fluorescence intensity (.cel files). Image inspection is performed manually immediately following each scan.

### **Measurement Data and Specifications**

#### **Quantifications based on images:**

The GeneChip expression arrays contain control probe sets for both spiked and endogenous RNA transcripts (e.g., BioB, BioC, BioD, CreX and species-specific actin and GAPDH). Following image processing and absolute analysis of the array pattern using the MAS 5.0 algorithm used within GCOS version 1.4.0 software (Affymetrix), six values are examined to assess overall assay performance: background, noise, average Signal, % Present, ratio of Signal values for probe sets representing the 5' and 3' ends of actin and GAPDH transcripts, and total Signal for probe sets for BioC, BioD and CreX. Assays demonstrating poor or marginal performance are flagged.

**Type of scanning hardware and software used:**

Software – GCOS version 1.4.0 (Affymetrix)

Scanning hardware – GeneChip Scanner 3000 with 7G upgrade (Affymetrix)

**Type of image analysis software used:**

GCOS version 1.4.0 (Affymetrix)

**Description of measurements produced by the image-analysis software and measurements used in the analysis:**

Probe level measurements produced by GCOS version 1.4.0 (.cel files).

**Complete output of the image analysis before data selection and transformation (spot quantitation matrices):**

Original Affymetrix output files (.cel files)

**Data selection and transformation procedures:**

The Robust Multichip Analysis (RMA) was used for signal quantification and performed using GeneSifter software ([www.genesifter.com](http://www.genesifter.com)). The RMA was applied to the probe-level measurements contained in .cel files. Data analysis was performed using GeneSifter.

**Final gene expression data table(s) used by authors to make their conclusions after data selection and transformation (gene expression data matrices):**

All normalized microarray data sets generated from these studies can be found in Data S1-S5.

**Array Design****Platform type:**

Affymetrix oligonucleotide array

**Surface and Coating Specifications:**

Glass

**Array:**

Affymetrix Rhesus Macaque Genome Array

**Features on the array:**

See [http://www.affymetrix.com/products/arrays/specific/rhesus\\_macaque.affx](http://www.affymetrix.com/products/arrays/specific/rhesus_macaque.affx)

**Reporters on the array:**

See [http://www.affymetrix.com/products/arrays/specific/rhesus\\_macaque.aff](http://www.affymetrix.com/products/arrays/specific/rhesus_macaque.aff)
